# Supplementary material
Source: PubMed Central journal article supplement (PMC8185080)
Supplement: 41416_2021_1350_MOESM1_ESM.pdf [file 41416_2021_1350_MOESM1_ESM.pdf]

## **Supplementary figure legends:**

### **Supplementary figure 1:**

a) Comparison of total CTC numbers between tumor location (head vs. tail,  $n=65$ ,  $p=0.99$ ), b) Scatter plot depicting total CTC numbers in metastatic (M1) vs. non-metastatic in treatment-naïve patients ( $n=65$ ,  $p=0.47$ ), c) Comparison of total CTC numbers in different AJCC stages ( $n=65$ ,  $p=0.46$ ), d) Correlation matrix between maximum tumor diameter and total CTC number ( $n=21$ ,  $p=0.33$ ), e) Proportion of pEMT-CTC from total CTC count (Prop-pEMT) comparing metastatic (M1) and non-metastatic patients ( $p=0.0032$ ), f) Proportion of pEMT-CTC from total CTC count across different AJCC stages of PDAC ( $p=0.025$ ), g) Comparison of Prop-pEMT across different location of primary PDAC ( $n=65$ ,  $p=0.04$ ).

### **Supplementary figure 2:**

Comparison of proportion of different CTC subtypes in all draws on treatment ( $n=132$ ) in patients progression under therapy vs. patients without progression (SC:  $p=0.52$ , E:  $p=0.046$ , pEMT:  $p=0.056$ , EMT:  $p=0.008$ ).

### **Supplementary figure 3:**

Analysis of additional Vimentin expressing cells in circulation. a) Bright field and immunofluorescence images of 3 patient samples expressing CD31 or FAP in combination with Vimentin. BF: Bright field, Pan-CK: pan-cytokeratin, CD31: cluster of differentiation 31, Vim: vimentin, EpCAM: epithelial cell adhesion molecule, DAPI: 4',6-Diamidin-2-phenylindol, FAP: fibroblast activation protein, and CD45: Protein tyrosine phosphatase, receptor type C. b) Quantification of cell types presents in a).

### **Supplementary table 1:**

Comparison of different clinico-pathological parameters with CTC subtypes in all draws on therapy ( $n=132$ ).

### **Supplementary table 2:**

Comparison of different clinico-pathological parameters with CTC subtypes in treatment-naïve patients (n=65)

**Supplementary table 3:**

Cox proportional hazard analysis of clinicopathological parameters. A) Overall survival of baseline treatment-naïve patients (n=65), B) Progression-free survival of baseline treatment-naïve patients (n=65) C) Multivariable Cox model for PFS.

**Supplementary table 4:**

Summary of calculated PFS using different proportional cutoffs for E, M, pEMT and SC in BTN patients (n=65).

**Supplementary table 5:**

Summary of calculated OS using different proportional cutoffs for E, M, pEMT and SC in BTN draws (n=65)

**Supplementary table 6:**

PFS and OS of different pEMT total counts in BTN draws (n=65)

**Supplementary table 7:**

Comparison of different clinico-pathological parameters with CTC subtypes across last draw before surgery (n=22).

# Supplementary figure 1

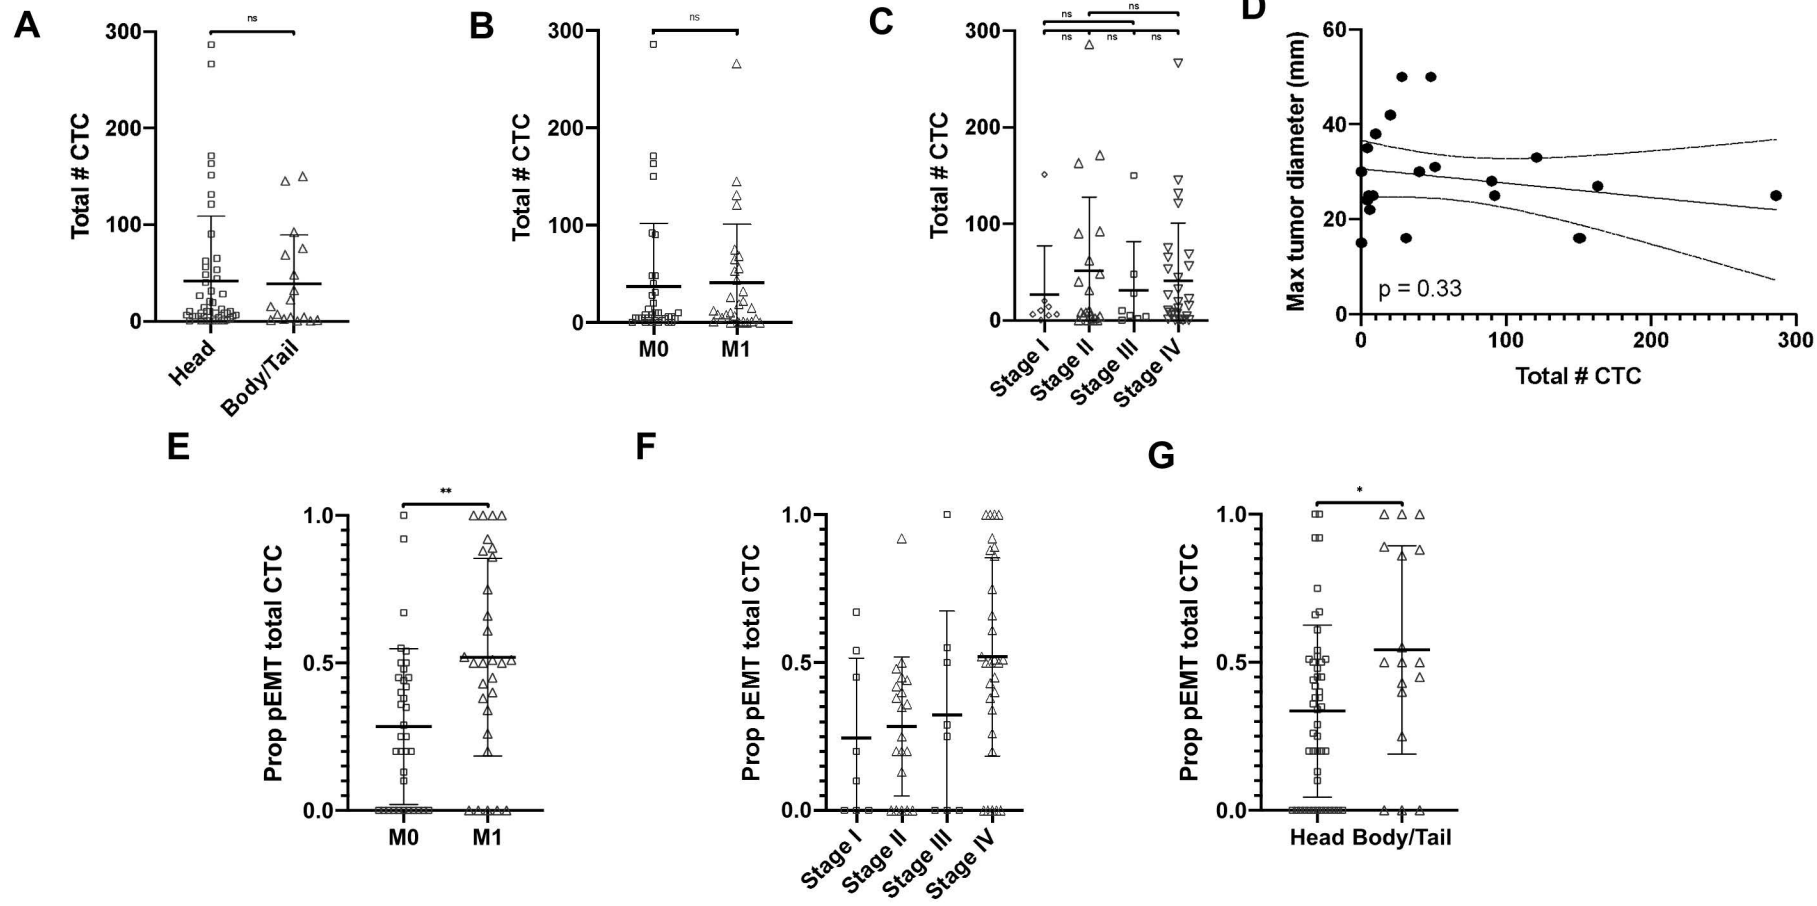

# Supplementary figure 2

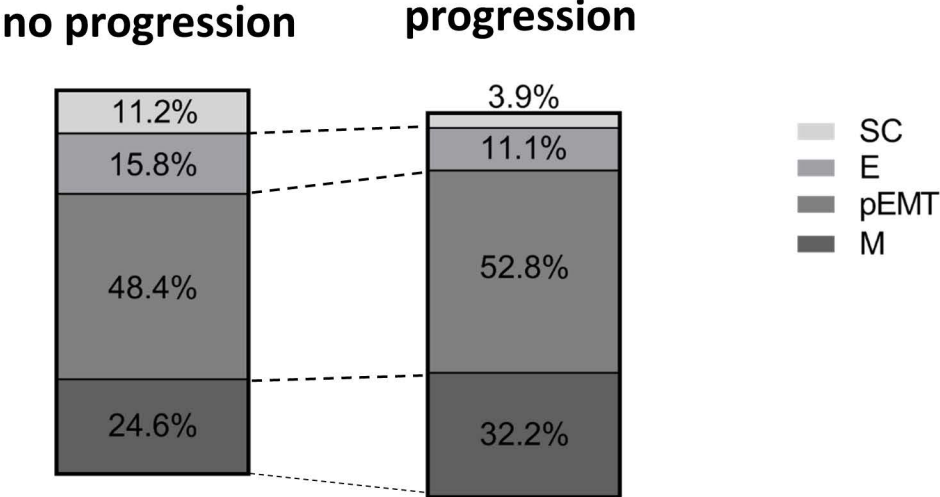

# Supplementary figure 3

**A**

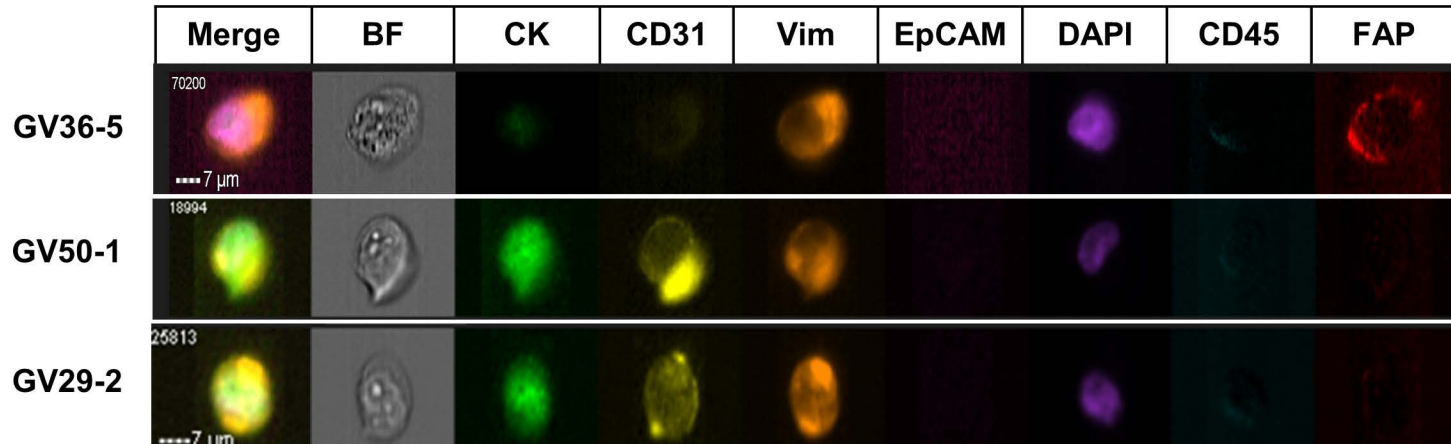

**B**

| Sample | CD31+/CK+ | FAP+/CK+ | Vim+/CK+ | CD45- |
|--------|-----------|----------|----------|-------|
| GV29-2 | 2*        | 3        | 15       | 179   |
| GV50-1 | 2         | 1        | 21       | 103   |
| GV36-5 | 0         | 1        | 23       | 108   |

**Supplementary Table 1:** Comparison of different clinico-pathological parameters with CTC subtypes in treatment-naïve patients (n=65).

| Clinico-pathological Parameters | Total Number | Mean +/- std, median* Total CTC | P-value# | Mean +/- std, median* E-CTC | P-value# | Mean +/- std, median* pEMT-CTC | P-value# | Mean +/- std, median* M-CTC    | P-value# | Mean +/- std, median* SC-CTC | P-value# | Mean +/- std, median* Prop-pEMT (%) | P-value# |
|---------------------------------|--------------|---------------------------------|----------|-----------------------------|----------|--------------------------------|----------|--------------------------------|----------|------------------------------|----------|-------------------------------------|----------|
| BTN PDAC Cases 65 (100%)        |              |                                 |          |                             |          |                                |          |                                |          |                              |          |                                     |          |
| <b>Localization</b>             |              |                                 |          |                             |          |                                |          |                                |          |                              |          |                                     |          |
| Head                            | 48 (73.8%)   | 41.94 +/- 66.99, 10 (5, 50.5)   | 0.9941   | 1.83 +/- 5.65, 0 (0, 1)     | 0.9099   | 20.54 +/- 34.16, 4 (0, 22)     | 0.5097   | 13.63 +/- 23.14, 4 (0.5, 13.5) | 0.5190   | 5.94 +/- 19.95, 0 (0, 2)     | 0.5604   | 0.34 +/- 0.29, 0.35 (0, 0.5)        | 0.0472   |
| Body/Tail                       | 17 (26.2%)   | 39.21 +/- 50.19, 15 (2, 68.5)   |          | 0.62 +/- 1.5, 0 (0, 0.5)    |          | 22.47 +/- 28.83, 6 (1, 41)     |          | 14.41 +/- 24.51, 3 (0, 7)      |          | 1.71 +/- 3.44, 0 (0, 0)      |          |                                     |          |
| <b>Tumor size</b>               |              |                                 |          |                             |          |                                |          |                                |          |                              |          |                                     |          |
| 0-4cm                           | 15 (83.3%)   | 67.13 +/- 83.48, 31 (5, 121)    | 1.000    | 3.13 +/- 9.33, 0 (0, 1)     | 0.7679   | 34.8 +/- 41.77, 15 (1, 80)     | 0.9070   | 16.2 +/- 20.81, 5 (2, 22)      | 0.4855   | 13 +/- 33.4, 0 (0, 9)        | 0.5242   | 0.4 +/- 0.25, 0.44 (0.2, 0.54)      | 0.7267   |
| >4cm                            | 3 (16.7%)    | 32 +/- 14.42, 28 (20, 48)       |          | 4.33 +/- 7.51, 0 (0, 13)    |          | 9.67 +/- 2.08, 9 (8, 12)       |          | 17.33 +/- 16.2, 9 (7, 36)      |          | 0.67 +/- 1.15, 0 (0, 2)      |          | 0.33 +/- 0.11, 0.29 (0.25, 0.45)    |          |
| <b>Distant Metastasis (M)</b>   |              |                                 |          |                             |          |                                |          |                                |          |                              |          |                                     |          |
| <b>Category</b>                 |              |                                 |          |                             |          |                                |          |                                |          |                              |          |                                     |          |
| M <sub>0</sub>                  | 36 (55.4%)   | 41.22 +/- 65.76, 9 (4, 48)      | 0.6831   | 1.06 +/- 2.75, 0 (0, 0)     | 0.3520   | 18.58 +/- 31.97, 1.5 (0, 17.5) | 0.1941   | 15.58 +/- 23.54, 5 (2, 21.5)   | 0.1386   | 6 +/- 22.06, 0 (0, 1.5)      | 0.8572   | 0.28 +/- 0.26, 0.25 (0, 0.45)       | 0.0046   |
| M <sub>1</sub>                  | 29 (44.6%)   | 41.22 +/- 59.75, 15 (4, 56)     |          | 2.09 +/- 6.74, 0 (0, 1)     |          | 24.1 +/- 33.75, 6 (1, 34)      |          | 11.66 +/- 23.26, 3 (0, 7)      |          | 3.38 +/- 8.39, 0 (0, 2)      |          | 0.52 +/- 0.34, 0.5 (0.34, 0.86)     |          |
| <b>Histopathological Grade</b>  |              |                                 |          |                             |          |                                |          |                                |          |                              |          |                                     |          |
| G <sub>2</sub> (moderate)       | 13 (68.4%)   | 73.85 +/- 85.46, 31 (10, 121)   | 0.2193   | 4.62 +/- 10.24, 0 (0, 2)    | 0.3782   | 37.46 +/- 43.42, 12 (3, 80)    | 0.2039   | 17.31 +/- 20.94, 8 (3, 22)     | 0.5177   | 14.46 +/- 35.77, 1 (0, 5)    | 0.2040   | 0.4 +/- 0.23, 0.4 (0.25, 0.48)      | 0.5462   |
| G <sub>3</sub> (poor)           | 6 (31.6%)    | 25.5 +/- 35.56, 8 (5, 40)       |          | 0.83 +/- 2.04, 0 (0, 0)     |          | 10.83 +/- 16.24, 2.5 (1, 18)   |          | 12.33 +/- 16.56, 4 (2, 22)     |          | 1.5 +/- 3.67, 0 (0, 0)       |          | 0.31 +/- 0.25, 0.32 (0.1, 0.45)     |          |
| <b>UICC Stage</b>               |              |                                 |          |                             |          |                                |          |                                |          |                              |          |                                     |          |
| I                               | 8 (12.3%)    | 26.5 +/- 50.68, 8 (5.5, 17)     | 0.9274   | 0.63 +/- 1.77, 0 (0, 0)     | 0.7000   | 12 +/- 28.05, 1 (0, 6.5)       | 0.4121   | 12 +/- 18.69, 5 (3, 11.5)      | 0.5064   | 1.88 +/- 4.55, 0 (0, 1)      | 0.2107   | 0.24 +/- 0.27, 0.15 (0, 0.49)       | 0.0315   |

|     |            |                              |                          |                                 |                                |                           |                                 |
|-----|------------|------------------------------|--------------------------|---------------------------------|--------------------------------|---------------------------|---------------------------------|
| II  | 20 (30.8%) | 51.25 +/- 76.31, 9 (3, 76)   | 0.7 +/- 1.84, 0 (0, 0.5) | 23.2 +/- 35.29, 2.5 (0.5, 33.5) | 17.3 +/- 26.53, 5.5 (2, 22)    | 10.05 +/- 29.15, 0 (0, 7) | 0.28 +/- 0.23, 0.3 (0.06, 0.43) |
| III | 8 (12.3%)  | 30.88 +/- 50.86, 7.5 (3, 38) | 2.38 +/- 4.78, 0 (0, 3)  | 13.63 +/- 28.38, 3 (0, 10)      | 14.88 +/- 22.08, 5.5 (0.5, 23) | 0 +/- 0, 0 (0, 0)         | 0.32 +/- 0.35, 0.27 (0, 0.53)   |
| IV  | 29 (44.6%) | 41.22 +/- 59.75, 15 (4, 56)  | 2.09 +/- 6.74, 0 (0, 1)  | 24.1 +/- 33.75, 6 (1, 34)       | 11.66 +/- 23.26, 3 (0, 7)      | 3.38 +/- 8.39, 0 (0, 2)   | 0.52 +/- 0.34, 0.5 (0.34, 0.86) |

---

\*Interquartile

#Wilcoxon rank sum test p-value

**Supplementary table 2:** Comparison of different clinico-pathological parameters with CTC subtypes in all draws on therapy (n=132).

| Response to therapy | Total Number of blood draws on therapy (n=132) | Mean +/- std, median*<br>Total CTC | P-value# | Mean +/- std, median*<br>E-CTC | P-value# | Mean +/- std, median*<br>pEMT-CTC | P-value# | Mean +/- std, median*<br>M-CTC | P-value# | Mean +/- std, median*<br>SC-CTC | P-value# | Mean +/- std, median*<br>Prop-pEMT (%) | P-value# |
|---------------------|------------------------------------------------|------------------------------------|----------|--------------------------------|----------|-----------------------------------|----------|--------------------------------|----------|---------------------------------|----------|----------------------------------------|----------|
| No progression      | 103 (78.0%)                                    | 16.94 +/- 32.16, 9 (0, 16)         | 0.0162   | 2.68 +/- 12.31, 0 (0, 1)       | 0.0489   | 8.19 +/- 17.86, 3 (0, 7)          | 0.0589   | 4.17 +/- 8.8, 1 (0, 6)         | 0.0087   | 1.89 +/- 4.11, 0 (0, 1)         | 0.5230   | 0.31 +/- 0.31, 0.33 (0, 0.5)           | 0.0410   |
| Progression         | 29 (22.0%)                                     | 31.93 +/- 61.06, 15 (5, 22)        |          | 3.55 +/- 10.33, 0 (0, 2)       |          | 16.86 +/- 33.59, 3 (2, 20)        |          | 10.28 +/- 19.16, 5 (0, 10)     |          | 1.24 +/- 3.5, 0 (0, 1)          |          | 0.42 +/- 0.31, 0.49 (0.14, 0.6)        |          |

\*Interquartile

#Wilcoxon rank sum test p-value



**Supplementary table 3:** Cox proportional hazard analysis of clinicopathological parameters. A) Overall survival of baseline treatment-naïve patients (n=65), B) Progression-free survival of baseline treatment-naïve patients (n=65) C) Multivariable Cox model for PFS.

A. OS in treatment-naïve patients

| <b>Clinico-pathological parameter</b> | <b>Hazard ratio [95% CI]<br/>Log transformed</b> | <b>p-value</b> | <b>Total</b> | <b>Events</b> |
|---------------------------------------|--------------------------------------------------|----------------|--------------|---------------|
| Total CTC number                      | 0.91(0.81,1.02)                                  | 0.092          | 65           | 23            |
| E-CTC number                          | 0.99(0.84,1.15)                                  | 0.852          | 65           | 23            |
| pEMT-CTC number                       | 0.93(0.83,1.04)                                  | 0.191          | 65           | 23            |
| M-CTC number                          | 0.9(0.79,1.02)                                   | 0.104          | 65           | 23            |
| SC-CTC number                         | 0.91(0.78,1.06)                                  | 0.215          | 65           | 23            |
| pEMT-Proportion/total CTC             | 0.76(0.18,3.29)                                  | 0.712          | 65           | 23            |
| Gender (m vs. f)                      | 1.43(0.61,3.3)                                   | 0.408          | 65           | 23            |
| Age                                   | 0.97(0.93,1.01)                                  | 0.105          | 65           | 23            |
| Prop_EMT/total CTC (>50%)             | 0.92(0.36,2.34)                                  | 0.860          | 65           | 23            |

B. PFS in treatment-naive patients

| <b>Clinico-pathological parameter</b> | <b>Hazard ratio [95% CI]<br/>Log transformed</b> | <b>p-value</b> | <b>Total</b> | <b>Events</b> |
|---------------------------------------|--------------------------------------------------|----------------|--------------|---------------|
| Total CTC number                      | 0.97(0.89,1.07)                                  | 0.564          | 65           | 49            |
| E-CTC number                          | 0.99(0.88,1.1)                                   | 0.837          | 65           | 49            |
| pEMT-CTC number                       | 0.99(0.9,1.08)                                   | 0.748          | 65           | 49            |
| M-CTC number                          | 0.95(0.87,1.04)                                  | 0.300          | 65           | 49            |
| SC-CTC number                         | 0.92(0.83,1.02)                                  | 0.095          | 65           | 49            |
| pEMT-Prop/total CTC                   | 2.17(0.8,5.92)                                   | 0.130          | 65           | 49            |
| Gender (m vs. f)                      | 1.5(0.83,2.72)                                   | 0.180          | 65           | 49            |
| Age                                   | 0.97(0.94,1)                                     | 0.058          | 65           | 49            |
| pEMT-Prop/total CTC<br>(>50%)         | 2.04(1.12,3.72)                                  | 0.020          | 65           | 49            |
| Stage I/II vs. stage IV               | 0.37 (0.20, 0.70)                                | 0.009          | 65           | 49            |
| Stage III vs. stage IV                | 0.59 (0.24, 1.45)                                |                |              |               |

C. Multivariate Cox Model for PFS

| <b>Clinico-pathological parameter</b> |             | <b>Hazard Ratio</b> | <b>95% Hazard Ratio Confidence Limits</b> |      | <b>p-value</b> |
|---------------------------------------|-------------|---------------------|-------------------------------------------|------|----------------|
| Stage                                 | I/II vs. IV | 0.54                | 0.27                                      | 1.06 | 0.190          |
|                                       | III vs IV   | 0.66                | 0.26                                      | 1.67 |                |
| SC-CTC number                         |             | 0.90                | 0.81                                      | 1.01 | 0.066          |
| Age                                   |             | 0.97                | 0.94                                      | 1.01 | 0.093          |
| pEMT-Prop (>50%)                      |             | 1.98                | 1.05                                      | 3.73 | 0.036          |

**Supplementary Table 4.** Summary of calculated PFS (days) using different proportional cutoffs for E, M, pEMT and SC in BTN draws (n=65)

| Cell Type               | Mean survival (days)<br>with SD below cutoff | Mean survival (days)<br>with SD above cutoff | p value (Log Rank) |
|-------------------------|----------------------------------------------|----------------------------------------------|--------------------|
| <b>Prop_pE cutoff</b>   |                                              |                                              |                    |
| 0.7                     |                                              | only one case <sup>a</sup>                   | 0.33               |
| 0.6                     |                                              | only one case <sup>a</sup>                   | 0.33               |
| 0.5                     |                                              | only one case <sup>a</sup>                   | 0.33               |
| 0.4                     |                                              | only three cases                             | 0.085              |
| 0.3                     | 335.6 ± 38.7                                 | 396.2 ± 76.9                                 | 0.15               |
| 0.2                     | 341.4 ± 39.8                                 | 323.1 ± 75.4                                 | 0.41               |
| 0.1                     | 340.4 ± 40.9                                 | 410.8 ± 102.3                                | 0.34               |
| <b>Prop_pM cutoff</b>   |                                              |                                              |                    |
| 0.7                     | 353.4 ± 43.2                                 | 288.9 ± 54.9                                 | 0.91               |
| 0.6                     | 259.3 ± 44.8                                 | 277.1 ± 47.1                                 | 0.68               |
| 0.5                     | 358.9 ± 46.5                                 | 291.2 ± 45.1                                 | 0.78               |
| 0.4                     | 315.7 ± 39.8                                 | 352.7 ± 57.9                                 | 0.98               |
| 0.3                     | 287.4 ± 44.1                                 | 375.4 ± 53.1                                 | 0.44               |
| 0.2                     | 274.2 ± 43.8                                 | 386.1 ± 53.7                                 | 0.25               |
| 0.1                     | 280.3 ± 45.1                                 | 379.2 ± 52.7                                 | 0.34               |
| <b>Prop_pSC cutoff</b>  |                                              |                                              |                    |
| 0.7                     | b                                            | b                                            | b                  |
| 0.6                     | b                                            | b                                            | b                  |
| 0.5                     | b                                            | b                                            | b                  |
| 0.4                     | 327.0 ± 37.6                                 | 503.0 ± 124.9                                | 0.11               |
| 0.3                     | 328.1 ± 38.3                                 | 443.2 ± 107.0                                | 0.18               |
| 0.2                     | 324.5 ± 38.6                                 | 408.8 ± 89.5                                 | 0.19               |
| 0.1                     | 339.4 ± 40.8                                 | 318.2 ± 71.6                                 | 0.80               |
| <b>Prop_pEMT cutoff</b> |                                              |                                              |                    |
| 0.7                     | 387.4 ± 45.1                                 | 183.1 ± 53.7                                 | 0.015              |
| 0.6                     | 395.5 ± 46.6                                 | 195.1 ± 52.5                                 | 0.011              |
| 0.5                     | 403.5 ± 49.5                                 | 216.4 ± 45.4                                 | 0.018              |
| 0.45                    | 375.5 ± 42.7                                 | 266.8 ± 60.3                                 | 0.069              |
| 0.4                     | 403.5 ± 49.5                                 | 341.4 ± 58.6                                 | 0.74               |
| 0.3                     | 319.3 ± 38.1                                 | 329.5 ± 49.4                                 | 0.46               |
| 0.2                     | 307.7 ± 41.5                                 | 345.7 ± 48.0                                 | 0.78               |
| 0.1                     | 306.8 ± 49.8                                 | 349.1 ± 44.9                                 | 0.85               |

<sup>a</sup>No statistics are computed because all cases are censored

<sup>b</sup>No comparison analysis is performed because the factor variable has only one value for every stratum.

**Supplementary Table 5.** Summary of calculated OS (days) using different proportional cutoffs for E, M, pEMT and SC in BTN draws (n=65)

| Cell type               | Mean survival (days) with SD below cutoff | Mean survival (days) with SD above cutoff | p value (Log Rank) |
|-------------------------|-------------------------------------------|-------------------------------------------|--------------------|
| <b>Prop_pE cutoff</b>   |                                           |                                           |                    |
| 0.7                     |                                           | only one case <sup>a</sup>                | 0.59               |
| 0.6                     |                                           | only one case <sup>a</sup>                | 0.59               |
| 0.5                     |                                           | only one case <sup>a</sup>                | 0.59               |
| 0.4                     |                                           | only three cases                          | 0.26               |
| 0.3                     | 652.6 ± 44.4                              | 473.7 ± 38.3                              | 0.71               |
| 0.2                     | 654.8 ± 45.2                              | 479.0 ± 34.4                              | 0.89               |
| 0.1                     | 644.6 ± 46.6                              | 700.3 ± 81.2                              | 0.56               |
| <b>Prop_pM cutoff</b>   |                                           |                                           |                    |
| 0.7                     | 655.9 ± 46.4                              | 509.0 ± 51.4                              | 0.88               |
| 0.6                     | 644.2 ± 47.2                              | 533.8 ± 46.6                              | 0.68               |
| 0.5                     | 643.1 ± 48.1                              | 529.7 ± 42.9                              | 0.71               |
| 0.4                     | 601.1 ± 48.9                              | 690.3 ± 60.8                              | 0.79               |
| 0.3                     | 514.5 ± 35.9                              | 724.1 ± 51.5                              | 0.16               |
| 0.2                     | 506.3 ± 36.8                              | 730.2 ± 50.3                              | 0.11               |
| 0.1                     | 515.5 ± 37.5                              | 719.3 ± 50.1                              | 0.19               |
| <b>Prop_pSC cutoff</b>  |                                           |                                           |                    |
| 0.7                     | <sup>b</sup>                              | <sup>b</sup>                              | <sup>b</sup>       |
| 0.6                     | <sup>b</sup>                              | <sup>b</sup>                              | <sup>b</sup>       |
| 0.5                     | <sup>c</sup>                              | <sup>c</sup>                              | <sup>c</sup>       |
| 0.4                     | 598.0 ± 48.3                              | 678.2 ± 60.9                              | 0.55               |
| 0.3                     | 645.6 ± 45.8                              | 602.0 ± 75.9                              | 0.49               |
| 0.2                     | 645.6 ± 46.7                              | 584.6 ± 63.9                              | 0.57               |
| 0.1                     | 653.4 ± 48.0                              | 547.2 ± 43.4                              | 0.97               |
| <b>Prop_pEMT cutoff</b> |                                           |                                           |                    |
| 0.7                     | 684.7 ± 44.0                              | 498.4 ± 78.3                              | 0.39               |
| 0.6                     | 682.9 ± 45.6                              | 560.7 ± 80.9                              | 0.59               |
| 0.5                     | 668.9 ± 48.9                              | 617.9 ± 65.1                              | 0.86               |
| 0.45                    | 638.4 ± 43.1                              | 630.8 ± 69.7                              | 0.68               |
| 0.4                     | 598.0 ± 48.3                              | 678.2 ± 60.9                              | 0.55               |
| 0.3                     | 498.5 ± 31.2                              | 688.6 ± 54.1                              | 0.33               |
| 0.2                     | 493.1 ± 34.2                              | 693.2 ± 51.7                              | 0.23               |
| 0.1                     | 496.5 ± 37.9                              | 686.2 ± 49.8                              | 0.31               |

<sup>a</sup>No statistics are computed because all cases are censored

<sup>b</sup>No comparison analysis is performed because the factor variable has only one value for every stratum.

<sup>c</sup>No statistics are computed because all cases are censored.

**Supplementary Table 6:** PFS and OS (days) of different pEMT total counts in BTN draws (n=65)

|            | <b>total_pEMT cutoff</b> | <b>Mean survival (days) with SD below cutoff</b> | <b>Mean survival (days) with SD above cutoff</b> | <b>p value (Log Rank)</b> |
|------------|--------------------------|--------------------------------------------------|--------------------------------------------------|---------------------------|
| <b>PFS</b> |                          |                                                  |                                                  |                           |
|            | 75                       | 668.9 ± 45.0                                     | 607.7 ± 59.4                                     | 0.92                      |
|            | 50                       | 662.5 ± 48.1                                     | 575.5 ± 53.1                                     | 0.87                      |
|            | 30                       | 644.4 ± 50.4                                     | 656.1 ± 69.5                                     | 0.44                      |
|            | 20                       | 647.9 ± 51.6642.6 ± 65.6                         | 266.8 ± 60.3                                     | 0.51                      |
|            | 15                       | 645.8 ± 53.7                                     | 633.9 ± 63.5                                     | 0.58                      |
|            | 10                       | 574.5 ± 48.3                                     | 722.5 ± 62.4                                     | 0.13                      |
|            | 5                        | 483.3 ± 29.9                                     | 722.9 ± 55.1                                     | 0.09                      |
|            | 1                        | 488.8 ± 39.6                                     | 690.7 ± 49.2                                     | 0.21                      |
| <b>OS</b>  |                          |                                                  |                                                  |                           |
|            | 75                       | 340.6 ± 40.5                                     | 373.7 ± 112.5                                    | 0.45                      |
|            | 50                       | 355.5 ± 44.0                                     | 296.5 ± 66.2                                     | 0.82                      |
|            | 30                       | 357.2 ± 46.2                                     | 303.5 ± 57.9                                     | 0.82                      |
|            | 20                       | 366.5 ± 49.2                                     | 290.4 ± 48.9                                     | 0.56                      |
|            | 15                       | 375.0 ± 51.7                                     | 289.4 ± 46.0                                     | 0.46                      |
|            | 10                       | 325.0 ± 44.8                                     | 360.0 ± 60.1                                     | 0.84                      |
|            | 5                        | 276.0 ± 34.9                                     | 377.9 ± 55.2                                     | 0.47                      |
|            | 1                        | 289.6 ± 50.2                                     | 358.1 ± 45.3                                     | 0.83                      |

**Supplementary table 7:** Comparison of different clinico-pathological parameters with CTC subtypes across last draw before surgery (n=22).

| Recurrence after surgery | Total Number (n=22) | Mean +/- std, median*<br>Total CTC | P-value# | Mean +/- std, median*<br>E-CTC | P-value# | Mean +/- std, median*<br>pEMT-CTC | P-value# | Mean +/- std, median*<br>M-CTC | P-value# | Mean +/- std, median*<br>SC-CTC | P-value# | Mean +/- std, median* Prop-pEMT (%) | P-value# |
|--------------------------|---------------------|------------------------------------|----------|--------------------------------|----------|-----------------------------------|----------|--------------------------------|----------|---------------------------------|----------|-------------------------------------|----------|
| >12 month                | 15 (68.2%)          | 42.67 +/- 74.6, 14 (5, 31)         | 0.6020   | 7.2 +/- 15.47, 0 (0, 8)        | 0.6488   | 16.53 +/- 31.97, 6 (1, 15)        | 0.3169   | 8.73 +/- 12.93, 3 (1, 13)      | 0.9159   | 10.2 +/- 32.98, 1 (0, 3)        | 0.5401   | 0.32 +/- 0.19, 0.36 (0.2, 0.44)     | 0.2436   |
| < 12 month               | 7 (31.8%)           | 43 +/- 46.05, 20 (12, 92)          |          | 5.71 +/- 13.4, 0 (0, 3)        |          | 23.71 +/- 28.06, 14 (4, 41)       |          | 10.29 +/- 15.39, 5 (0, 18)     |          | 3.29 +/- 3.68, 1 (0, 7)         |          | 0.49 +/- 0.3, 0.45 (0.33, 0.7)      |          |

\*Interquartile

#Wilcoxon rank sum test p-value
